# Supplementary material for: Human embryonic stem cell-derived cardiomyocyte platform screens inhibitors of SARS-CoV-2 infection
Source: PubMed Central journal article supplement (PMC8322398; doi:10.1038/s42003-021-02453-y), 2021-07-29
Supplement: 42003_2021_2453_MOESM2_ESM.pdf [file 42003_2021_2453_MOESM2_ESM.pdf]

## Description of Additional Supplementary Files

**File name:** Supplementary data 1

**Description:** Source data.

**File name:** Supplementary video 1

**Description:** Representative brightfield video files of beating human embryonic stem cell-derived cardiomyocytes (hESC-CMs) following infection with 25  $\mu$ L of SARS-CoV-2 spike pseudotyped lentivirus.

**File name:** Supplementary video 2

**Description:** Representative brightfield video files of beating human embryonic stem cell-derived cardiomyocytes (hESC-CMs) following infection with 50  $\mu$ L of SARS-CoV-2 spike pseudotyped lentivirus.

**File name:** Supplementary video 3

**Description:** Representative brightfield video files of beating human embryonic stem cell-derived cardiomyocytes (hESC-CMs) following infection with 100  $\mu$ L of SARS-CoV-2 spike pseudotyped lentivirus.

**File name:** Supplementary video 4

**Description:** Representative brightfield video files of beating human embryonic stem cell-derived cardiomyocytes (hESC-CMs). Control cells were treated with 100  $\mu$ L vesicular stomatitis virus (VSV-G) pseudotyped lentivirus.

**File name:** Supplementary video 5

**Description:** Representative brightfield video files of beating human embryonic stem cell-derived cardiomyocytes (hESC-CMs). Control cells left untreated with viral particles.
